# Supplementary material
Source: Springer Nature journal article supplement (https://www.springermedizin.de/resource/supplementary/13058_2012_3195_MOESM10_ESM.pdf/9703468)

■ Wip1 WT    ■ Wip1 KO

**Total Epithelial**

**Luminal**

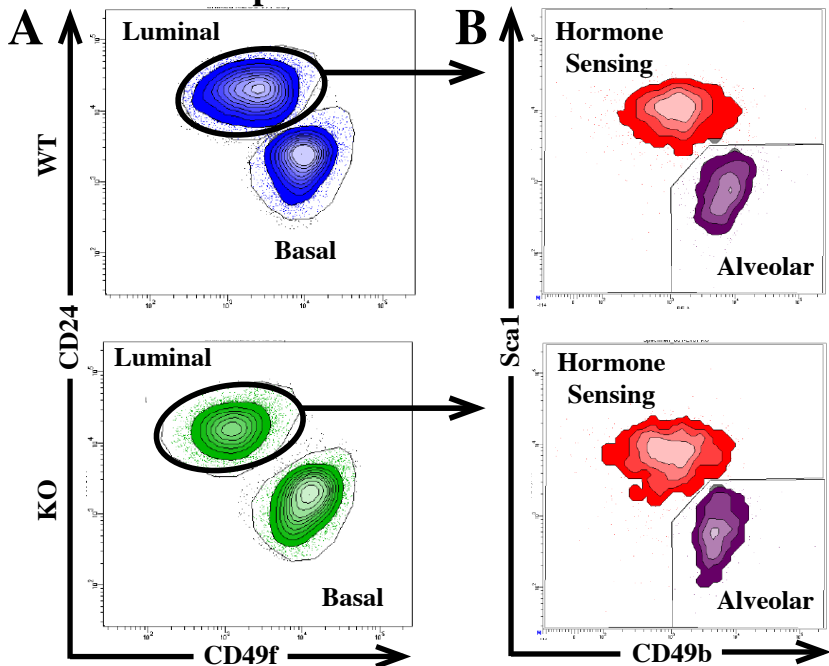

**C**

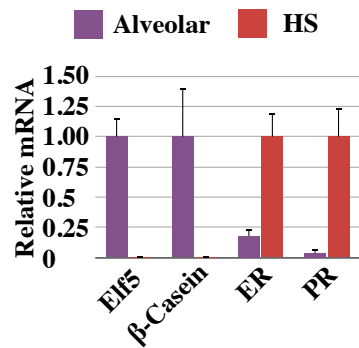

**D**

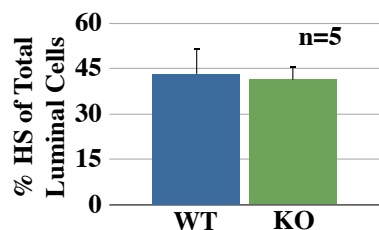

**E**

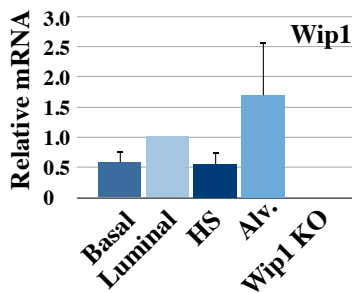

**F**

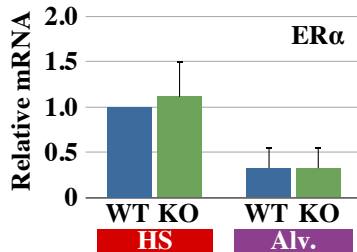

**G**

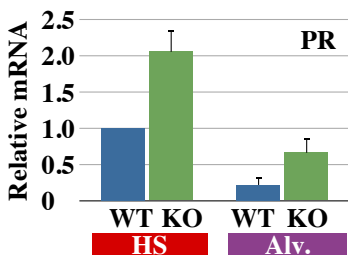

**H**

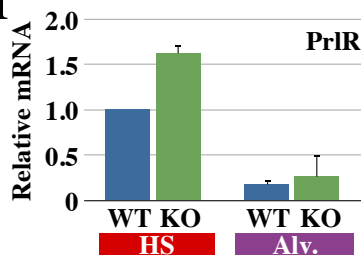

Supplement: MOESM10 [file 9703468]
